# Supplementary material
Source: publisher site journal article supplement (https://www.dovepress.com/article/281602)
Supplement: Supplementary file 1 [file get_supplementary_file.php]

**Supplementary Figure S1** Forest plots for the effect of ipragliflozin on lipid levels: (A) Change in high-density lipoprotein (HDL) level [mg/dL], (B) Change in low-density lipoprotein (LDL) level [mg/dL], (C) Change in triglycerides level [mg/dL]. Note: NCT#, National Clinical Trial number; 95%CI, 95%Confidence Interval.

**Supplementary Figure S2** Forest plots for the risk of hypoglycemia associated with ipragliflozin. Note: NCT#, National Clinical Trial number; 95%CI, 95%Confidence Interval.

**Supplementary Figure S3** Forest plots for the risk of genital tract infections (GTI) associated with ipragliflozin. Note: NCT#, National Clinical Trial number; 95%CI, 95%Confidence Interval.

**Supplementary Figure S4** Forest plots for the risk of urinary tract infections (UTI) associated with ipragliflozin. Note: NCT#, National Clinical Trial number; 95%CI, 95%Confidence Interval.

**Supplementary Figure S5** Forest plots for the risk of skin reactions associated with ipragliflozin. Note: NCT#, National Clinical Trial number; 95%CI, 95%Confidence Interval.

**Supplementary Figure S6** Forest plots for the risk of bone fractures associated with ipragliflozin. Note: NCT#, National Clinical Trial number; 95%CI, 95%Confidence Interval.

Figure S1A

A

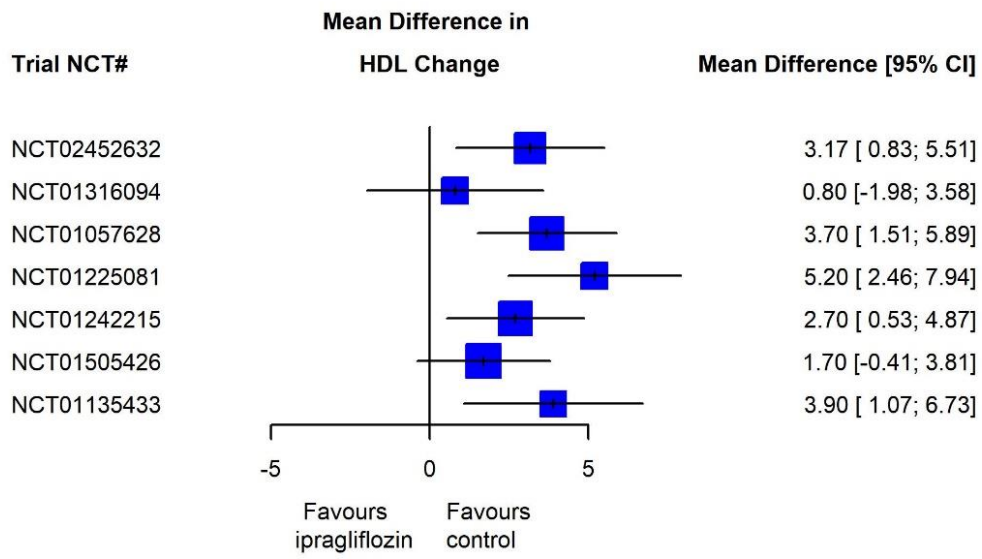

Note: Based on published unadjusted values and may differ from adjusted results

Figure S1B

B

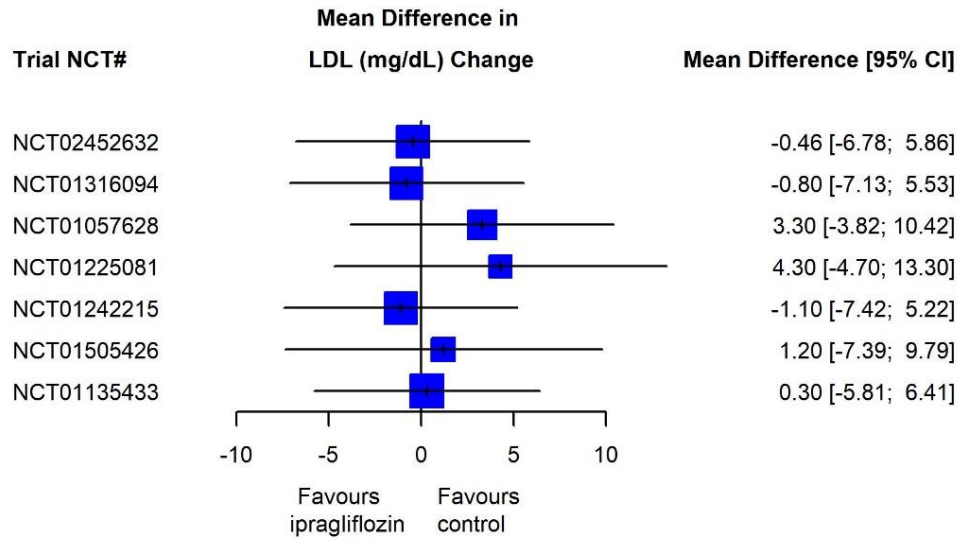

Note: Based on published unadjusted values and may differ from adjusted results

Figure S1C

C

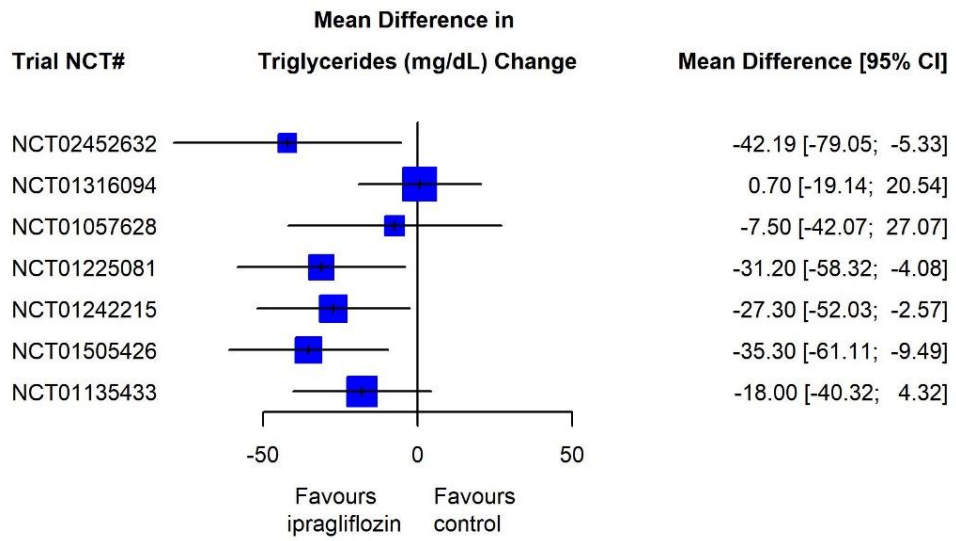

Note: Based on published unadjusted values and may differ from adjusted results

Figure S2

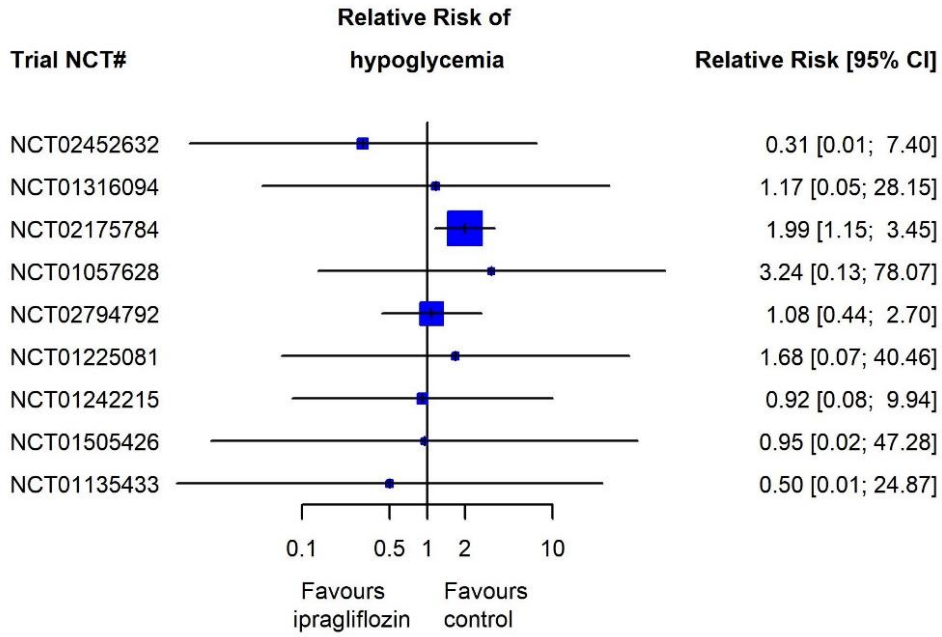

Note: Based on published unadjusted values and may differ from adjusted results. For studies with zero events, 0.5 was added to all cell frequencies.

Figure S3

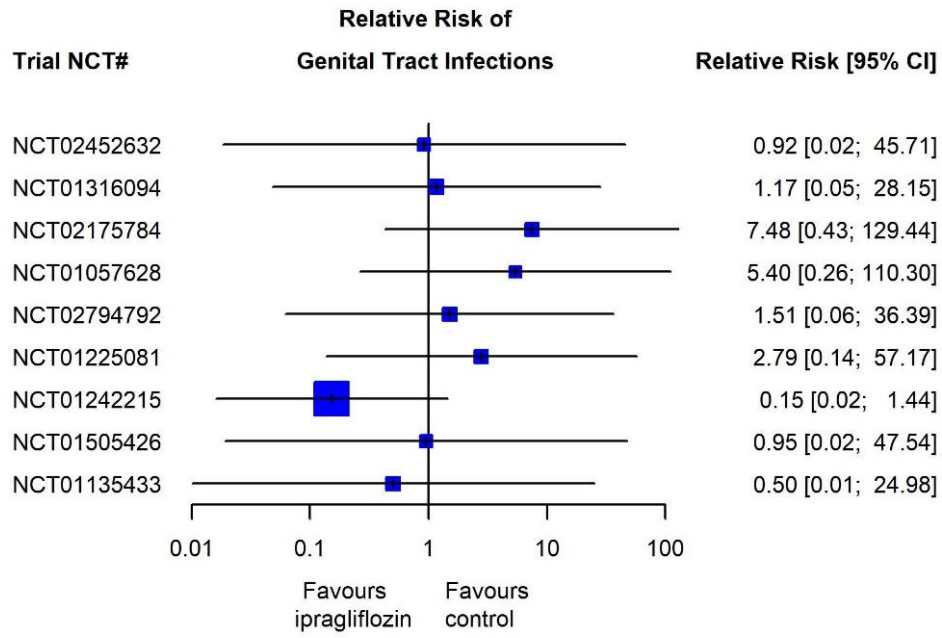

Note: Based on published unadjusted values and may differ from adjusted results. For studies with zero events, 0.5 was added to all cell frequencies.

Figure S4

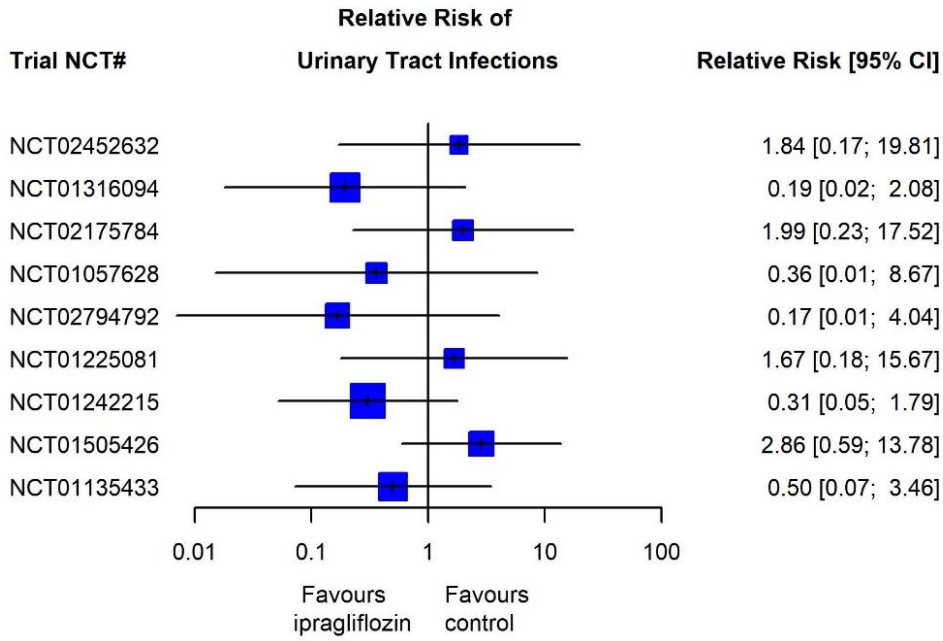

Note: Based on published unadjusted values and may differ from adjusted results. For studies with zero events, 0.5 was added to all cell frequencies.

Figure S5

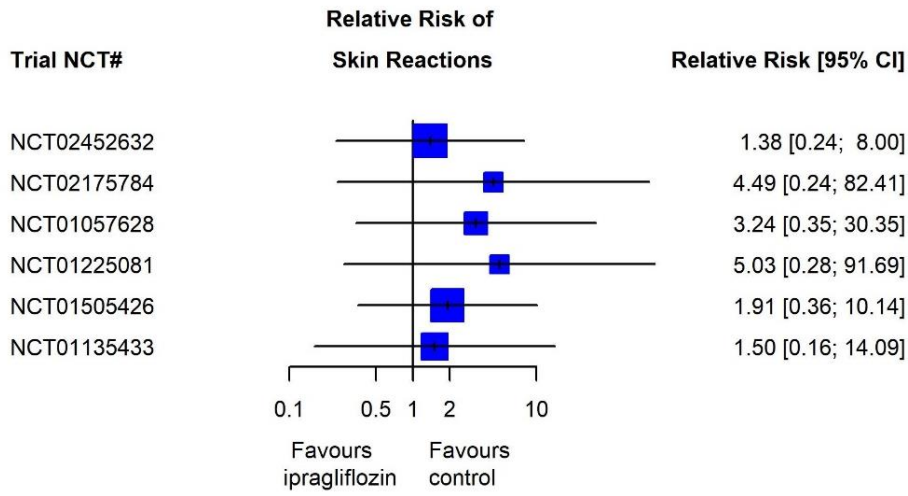

Note: Based on published unadjusted values and may differ from adjusted results. For studies with zero events, 0.5 was added to all cell frequencies.



Figure S6

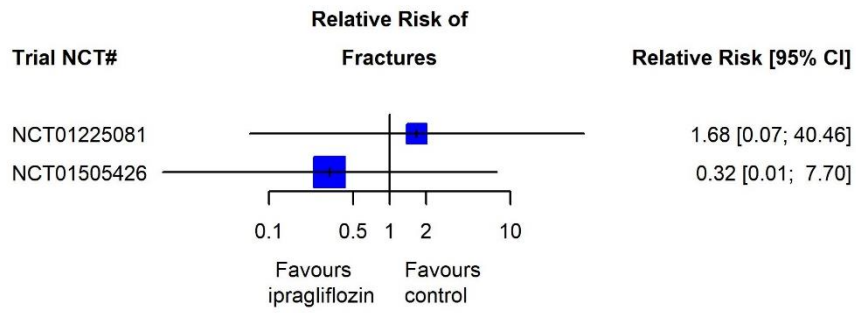

Note: Based on published unadjusted values and may differ from adjusted results. For studies with zero events, 0.5 was added to all cell frequencies.
